# Supplementary material for: A flavonoid 3-O-glucoside:2″-O-glucosyltransferase responsible for terminal modification of pollen-specific flavonols in Arabidopsis thaliana
Source: PubMed Central journal article supplement — Plant J. 2014 Jul 28;79(5):769–82. doi: 10.1111/tpj.12580 (PMC4282749; doi:10.1111/tpj.12580), 2014-07-28
Supplement: tpj0079-0769-sd1.pdf [file tpj0079-0769-sd1.pdf]

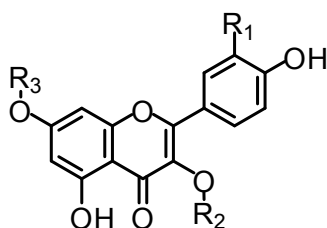

- f1:  $R_1=H$ ,  $R_2=rha$ ,  $R_3=rha$   
 f2:  $R_1=H$ ,  $R_2=glc$ ,  $R_3=rha$   
 f3:  $R_1=H$ ,  $R_2=rha(1\rightarrow2)glc$ ,  $R_3=rha$   
 f4:  $R_1=H$ ,  $R_2=glc(1\rightarrow6)glc$ ,  $R_3=rha$   
 f5:  $R_1=OH$ ,  $R_2=rha$ ,  $R_3=rha$   
 f6:  $R_1=OH$ ,  $R_2=glc$ ,  $R_3=rha$   
 f7:  $R_1=OH$ ,  $R_2=rha$ ,  $R_3=glc$   
 f8:  $R_1=OH$ ,  $R_2=rha(1\rightarrow2)glc$ ,  $R_3=rha$   
 f9:  $R_1=H$ , conjugate  
 f10:  $R_1=H$ ,  $R_2=hex+deoxyhex$ ,  $R_3=H$   
 f11:  $R_1=H$ , conjugate  
 f12:  $R_1=H$ ,  $R_2=rha+conjugate$ ,  $R_3=H$   
 f13:  $R_1=OH$ ,  $R_2=hex+deoxyhex$ ,  $R_3=H$   
 f14:  $R_1=OCH_3$ ,  $R_2=glc$ ,  $R_3=rha$   
 f15:  $R_1=OCH_3$ ,  $R_2=rha$ ,  $R_3=glc$   
 f16:  $R_1=OH$ ,  $R_2=glc$ ,  $R_3=H$   
 f17:  $R_1=H$ ,  $R_2=rha$ ,  $R_3=H$   
 f18:  $R_1=H$ ,  $R_2=glc$ ,  $R_3=H$   
 f19:  $R_1=H$ ,  $R_2=ara$ ,  $R_3=rha$   
 f20:  $R_1=H$ ,  $R_2=rha$ ,  $R_3=glc$   
 f21:  $R_1=H$ ,  $R_2=glc(1\rightarrow2)glc$ ,  $R_3=H$   
 f22:  $R_1=H$ ,  $R_2=pent+deoxyhex$ ,  $R_3=rha$   
 f23:  $R_1=OH$ ,  $R_2=ara$ ,  $R_3=H$   
 f24:  $R_1=OH$ ,  $R_2=rha$ ,  $R_3=H$   
 f25:  $R_1=OH$ ,  $R_2=ara$ ,  $R_3=rham$   
 f26:  $R_1=OH$ ,  $R_2=glc(1\rightarrow2)glc$ ,  $R_3=H$   
 f27:  $R_1=OCH_3$ ,  $R_2=rha$ ,  $R_3=H$   
 f28:  $R_1=OCH_3$ ,  $R_2=glc$ ,  $R_3=H$   
 f29:  $R_1=OCH_3$ ,  $R_2=ara$ ,  $R_3=rha$   
 f30:  $R_1=OCH_3$ ,  $R_2=rha$ ,  $R_3=rha$   
 f31:  $R_1=OCH_3$ ,  $R_2=glc+hex$ ,  $R_3=H$   
 f32:  $R_1=OCH_3$ ,  $R_2=rha(1\rightarrow2)glc$ ,  $R_3=rha$   
 f33:  $R_1=H$ ,  $rha+hex+mal$   
 f34:  $R_1=OH$ ,  $rha+hex+mal$   
 f35:  $R_1=OCH_3$ ,  $rha+hex+mal$

Figure S1. Flavonol glycosides in *Arabidopsis*.

ara, arabinose; deoxyhex, deoxyhexose; glc, glucose; hex, hexose; mal, maltose; pent, pentose; rha, rhamnose.
