# Supplementary material for: A flavonoid 3-O-glucoside:2″-O-glucosyltransferase responsible for terminal modification of pollen-specific flavonols in Arabidopsis thaliana
Source: PubMed Central journal article supplement — Plant J. 2014 Jul 28;79(5):769–82. doi: 10.1111/tpj.12580 (PMC4282749; doi:10.1111/tpj.12580), 2014-07-28
Supplement: tpj0079-0769-sd2.pdf [file tpj0079-0769-sd2.pdf]

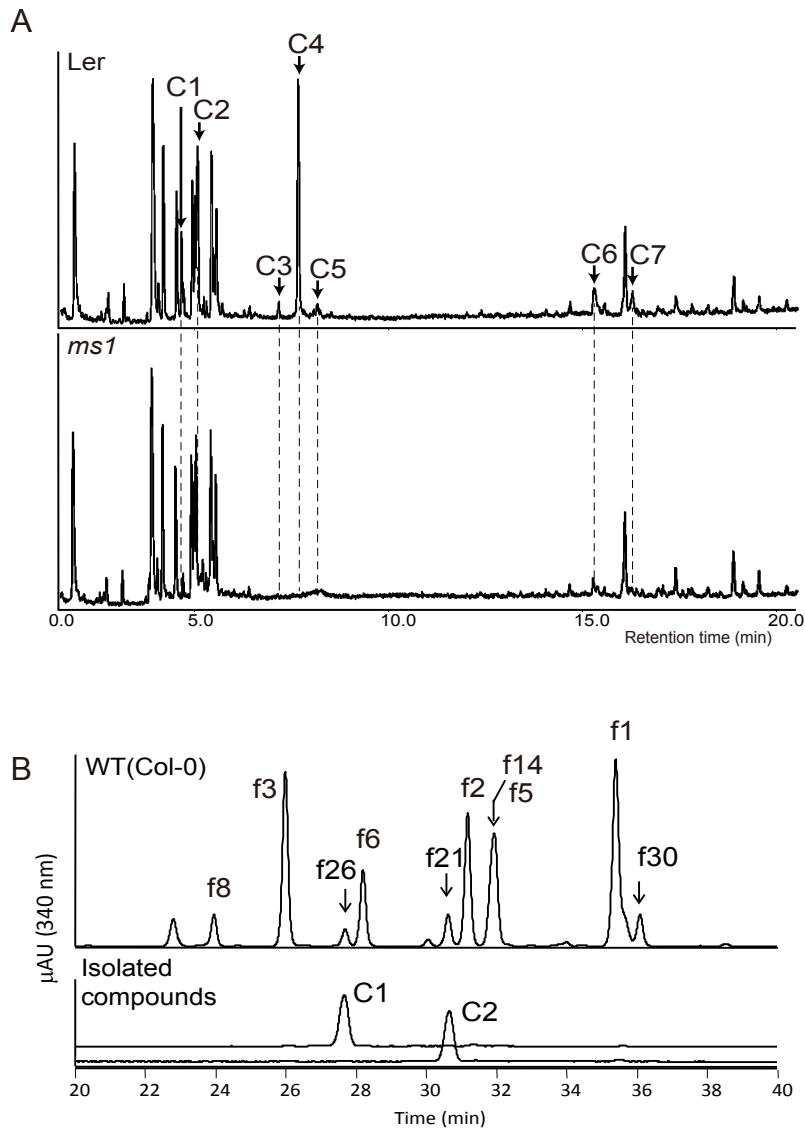

Figure S2. UPLC/PDA/MS analyses.

(A) Total ion chromatogram (150  $m/z$  – 1000  $m/z$ ) of aqueous methanol extracts from flowers of the wild-type (Ler) and *ms1* mutants. Compounds, C1-C7, are missing from *ms1* mutants.

(B) UPLC-PDA chromatograms of aqueous methanol of the *Arabidopsis* wild-type (Col-0) and isolated compounds C1 (f21) and C2 (f26). Labels correspond to compounds are shown in Supplemental Figure1.
