# Supplementary material for: A flavonoid 3-O-glucoside:2″-O-glucosyltransferase responsible for terminal modification of pollen-specific flavonols in Arabidopsis thaliana
Source: PubMed Central journal article supplement — Plant J. 2014 Jul 28;79(5):769–82. doi: 10.1111/tpj.12580 (PMC4282749; doi:10.1111/tpj.12580), 2014-07-28
Supplement: tpj0079-0769-sd4.pdf [file tpj0079-0769-sd4.pdf]

A

At5g54010 248211\_at

Arabidopsis eFP Browser at bar.utoronto.ca  
Winter et al., 2007. PLoS One 2(8): e718

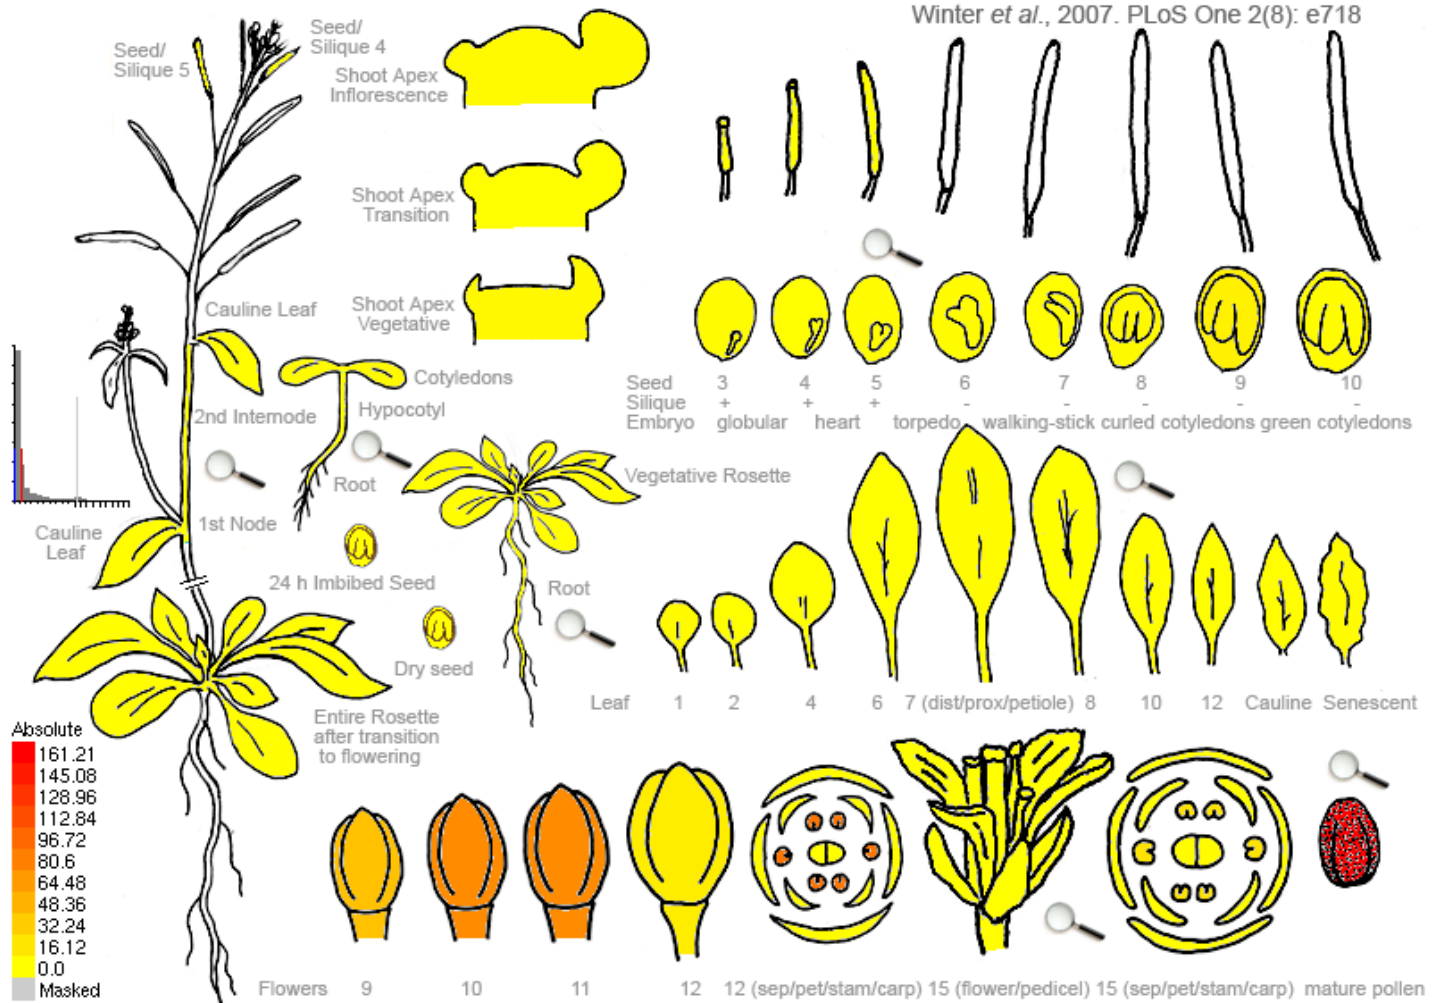

eFP Browser by B. Vinegar, drawn by J. Alls and N. Provart. Data from Gene Expression Map of Arabidopsis Development: Schmid et al., 2005, Nat. Gen. 37:501, and the Nambara lab for the imbibed and dry seed stages. Data are normalized by the GCOS method, TGT value of 100. Most tissues were sampled in triplicate.

B

Microgametogenesis  
(Pollen Development)

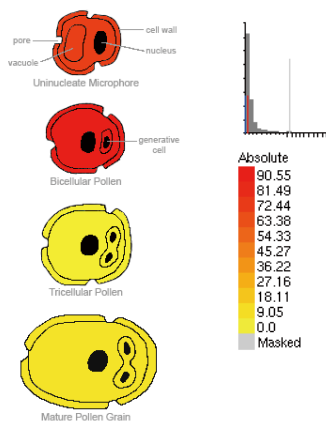

- Plant material from the pollen of 5.10 growth stage wild-type *Arabidopsis thaliana* plants of Ler-0 ecotype was analyzed  
- Plants grown under 16/8 hour light/dark conditions at 21°C  
- All measurements were taken in duplicates - the average of which is shown  
- RNA was isolated and hybridized to the ATH1 GeneChip  
- The data were normalized by GCOS normalization, TGT 100

Honyis & Twill (2004) Gen. Biol. 5:R85

Figure S4. Output image from the Arabidopsis eFP browser showing the expression pattern of At5g54010 in the developmental series. A) Data Source, Developmental Map ; Mode, absolute. B) Data Source, Tissue Specific-microgametogenesis (pollen development); Mode, absolute.
