# Supplementary material for: A flavonoid 3-O-glucoside:2″-O-glucosyltransferase responsible for terminal modification of pollen-specific flavonols in Arabidopsis thaliana
Source: PubMed Central journal article supplement — Plant J. 2014 Jul 28;79(5):769–82. doi: 10.1111/tpj.12580 (PMC4282749; doi:10.1111/tpj.12580), 2014-07-28
Supplement: tpj0079-0769-sd5.pdf [file tpj0079-0769-sd5.pdf]

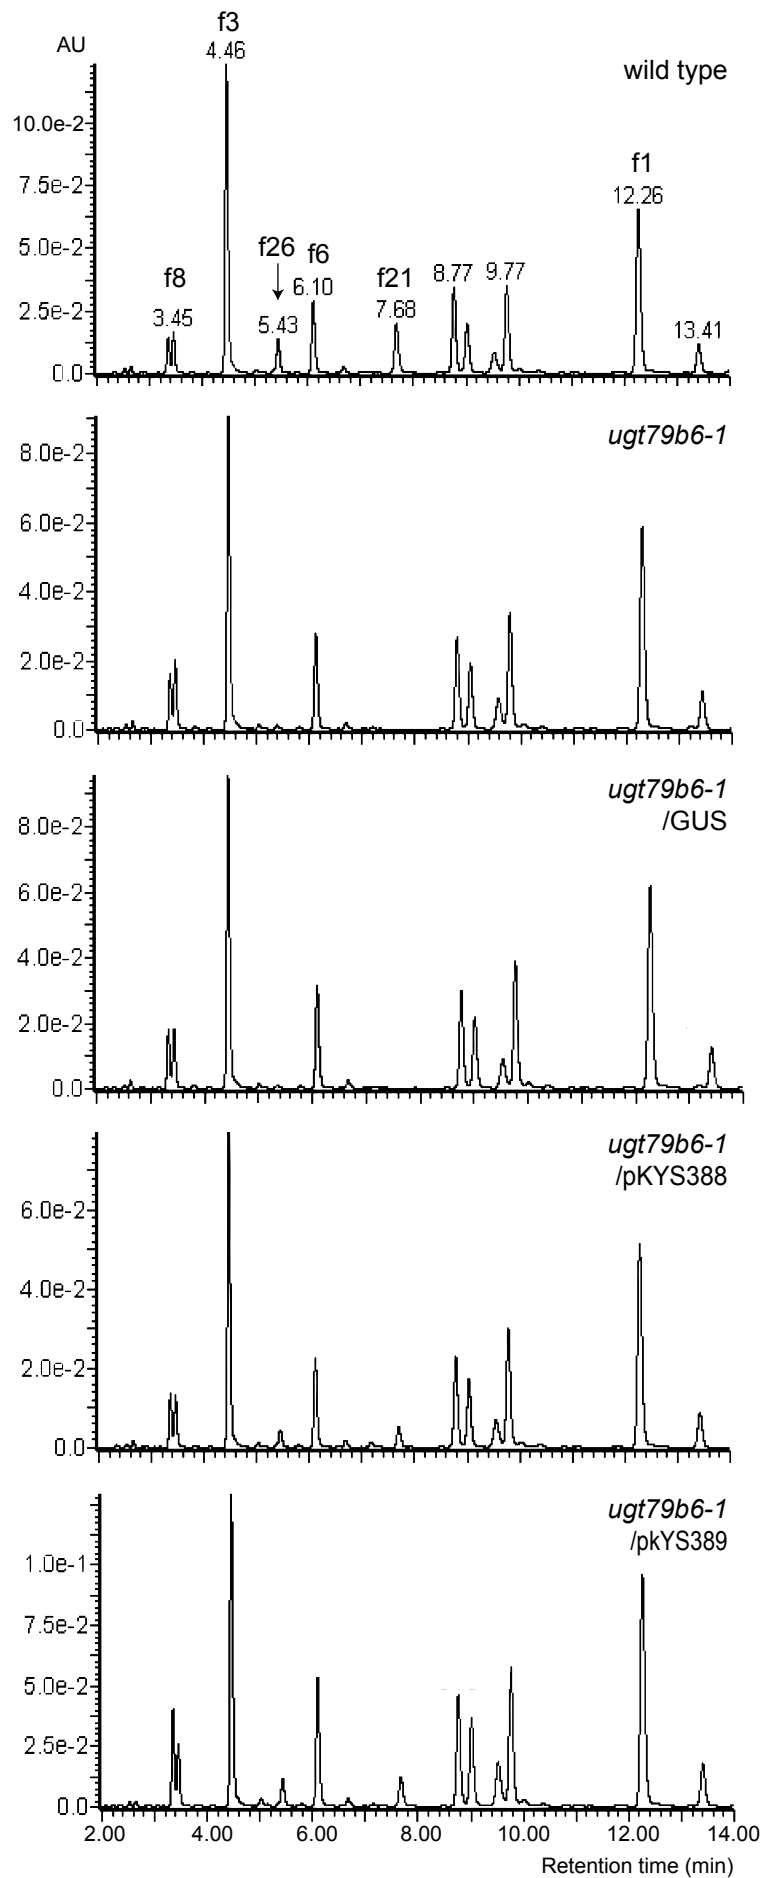

Figure S5. UPLC/PDA/MS analyses of the *ugt79b6-1* mutant lines.

Flavonol composition of flowers of wild-type (Col-0), *ugt79b6-1* deficient mutant (*ugt79b6-1*), *ugt79b6-1* deficient mutants complemented with GUS (*ugt79b6-1*/GUS) and genomic UGT79B6 clone (*ugt79b6-1*/pKYS388, *ugt79b6-1*/pKYS389). Labels correspond to compounds are shown in Supplemental Figure 1.
