# Supplementary material for: A flavonoid 3-O-glucoside:2″-O-glucosyltransferase responsible for terminal modification of pollen-specific flavonols in Arabidopsis thaliana
Source: PubMed Central journal article supplement — Plant J. 2014 Jul 28;79(5):769–82. doi: 10.1111/tpj.12580 (PMC4282749; doi:10.1111/tpj.12580), 2014-07-28
Supplement: tpj0079-0769-sd6.pdf [file tpj0079-0769-sd6.pdf]

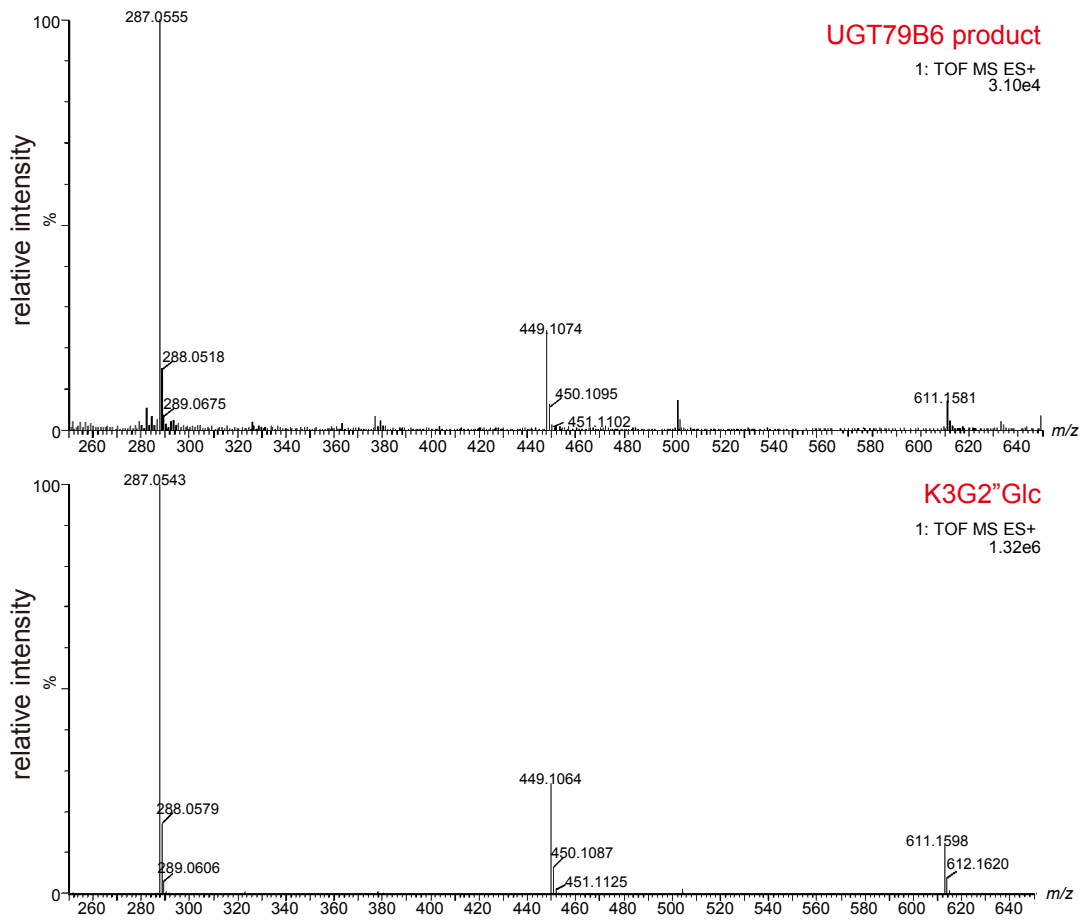

Figure S6. MS/MS spectra of the product catalyzed by UGT79B6 (UGT79B6 product) is identical to that of the standard, kaempferol 3-*O*-glucosyl-(1→2)-glucoside (K3G2'' Glc)
