# Supplementary material for: A flavonoid 3-O-glucoside:2″-O-glucosyltransferase responsible for terminal modification of pollen-specific flavonols in Arabidopsis thaliana
Source: PubMed Central journal article supplement — Plant J. 2014 Jul 28;79(5):769–82. doi: 10.1111/tpj.12580 (PMC4282749; doi:10.1111/tpj.12580), 2014-07-28
Supplement: tpj0079-0769-sd7.pdf [file tpj0079-0769-sd7.pdf]

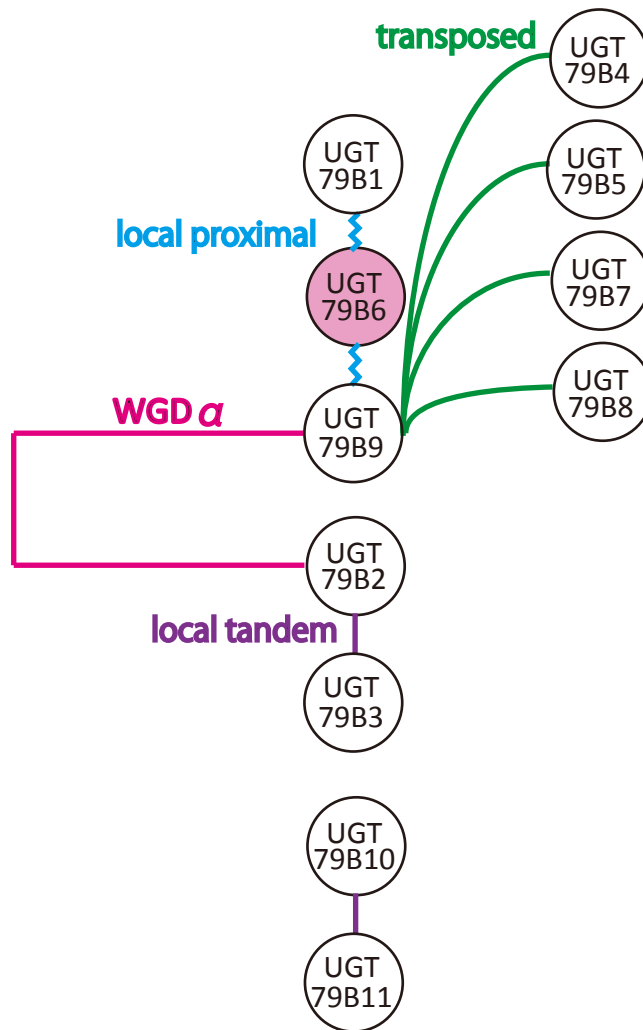

Figure S7. Modes of gene duplication in Arabidopsis UGT79 subfamily. The gene duplication modes proposed by Wang et al., 2013 were shown (Wang et al., 2013). WGD, whole genome duplication.
