# Supplementary material for: A flavonoid 3-O-glucoside:2″-O-glucosyltransferase responsible for terminal modification of pollen-specific flavonols in Arabidopsis thaliana
Source: PubMed Central journal article supplement — Plant J. 2014 Jul 28;79(5):769–82. doi: 10.1111/tpj.12580 (PMC4282749; doi:10.1111/tpj.12580), 2014-07-28
Supplement: tpj0079-0769-sd8.pdf [file tpj0079-0769-sd8.pdf]

Figure S8. Y.-Sakakibara and Nakabayashi et al.

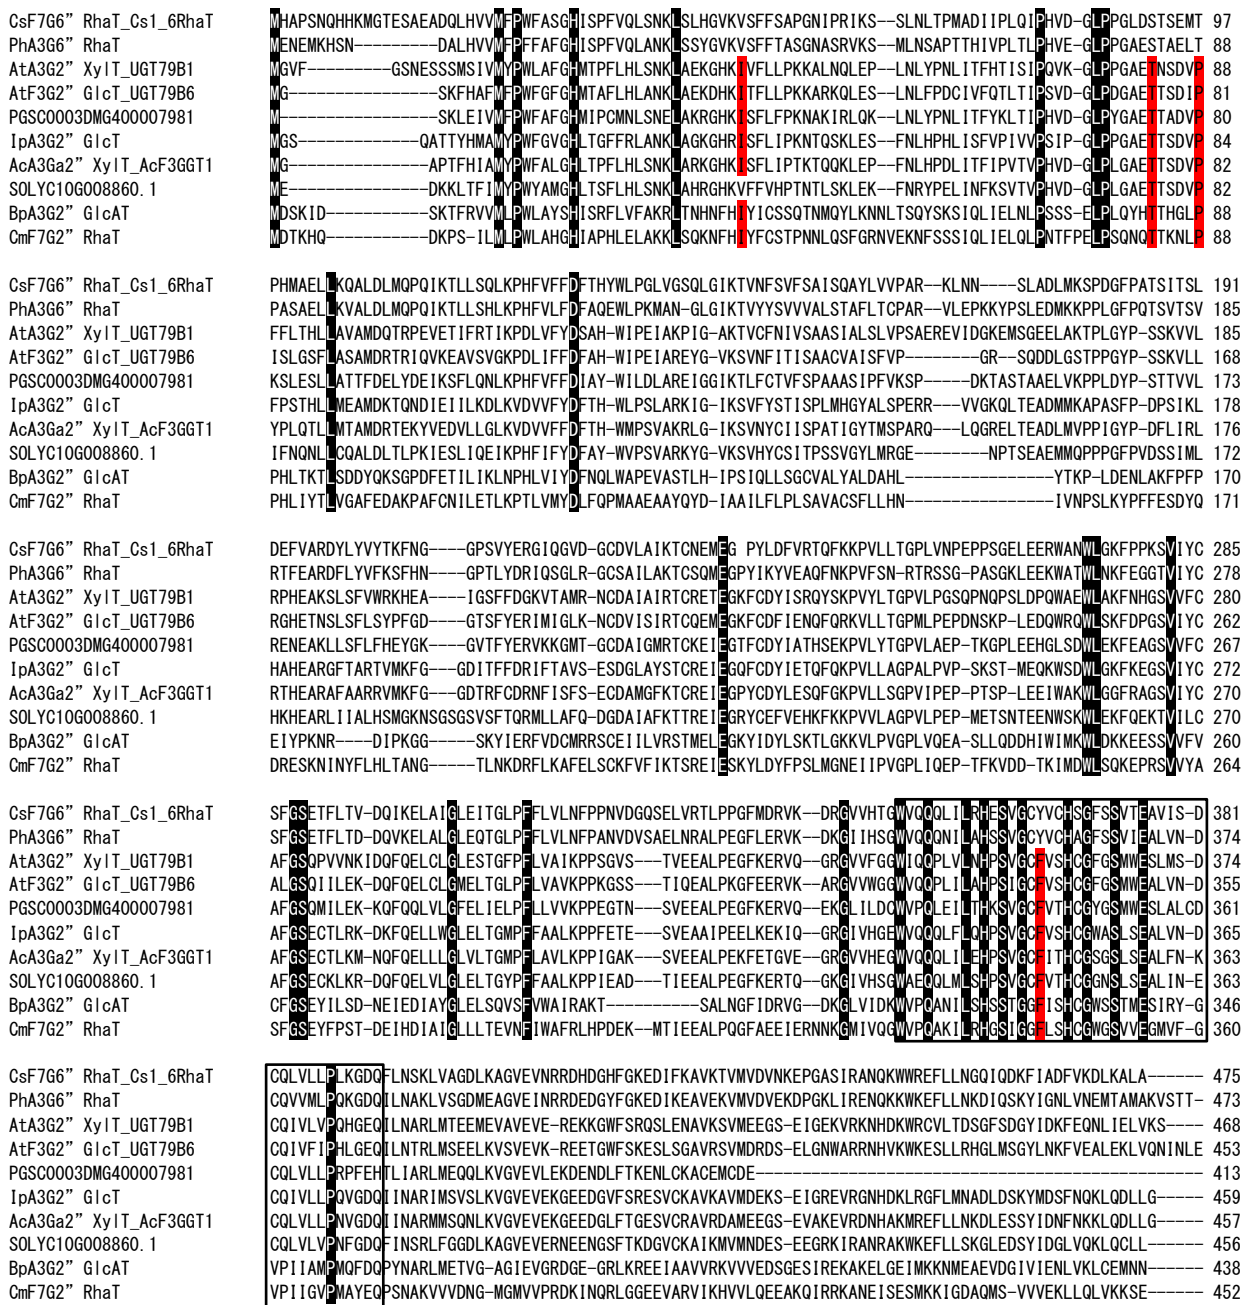

Figure S8. Multiple alignment of flavonoid UGTs catalyzing glycosyl transfer to a sugar moiety of flavonoid glycosides.

Multiple alignments of deduced amino acid sequences of flavonoid GGTs was generated with CLUSTALW (<http://www.clustal.org/>). The PSPG motif is boxed. Amino acid residues conserved in flavonoid GGTs are shown in white on a black background. Amino acid residues catalyzing glycosyl transfer in flavonoid 2"-O-glycosyltransferases in UGT79/UGT94 are indicated with a red background. A3G2"GlcAT, anthocyanidin 3-O-glucoside 2"-O-glucuronosyltransferase; A3G2"GlcT, anthocyanidin 3-O-glucoside 2"-O-glucosyltransferase; A3G6"RhaT, anthocyanidin 3-O-glucoside 6"-O-rhamnosyltransferase; A3Ga2"XylIT, anthocyanidin 3-O-galactoside 2"-O-xylosyltransferase; F3G2"GlcT, flavonol 3-O-glucoside 2"-O-glucosyltransferase; F7G2"RhaT, flavanone 7-O-glucoside 2"-O-rhamnosyltransferase; Abbreviations for species: Ac, *Actinidia chinensis*; At, *Arabidopsis thaliana*; Bp, *Bellis perennis*; Cm, *Citrus maxima*; Ip, *Ipomoea purpurea*; Ph, *Petunia hybrida*.
